# Supplementary material for: Ex vivo expansion of regulatory T cells from abdominal aortic aneurysm patients inhibits aneurysm in humanized murine model
Source: PubMed Central journal article supplement — J Vasc Surg. Author manuscript; Available in PMC 2023 Dec 1. (PMC10690961; doi:10.1016/j.jvs.2019.08.285), 2020-01-21
Supplement: NIHMS1551536-supplement-1.pdf [file NIHMS1551536-supplement-1.pdf]

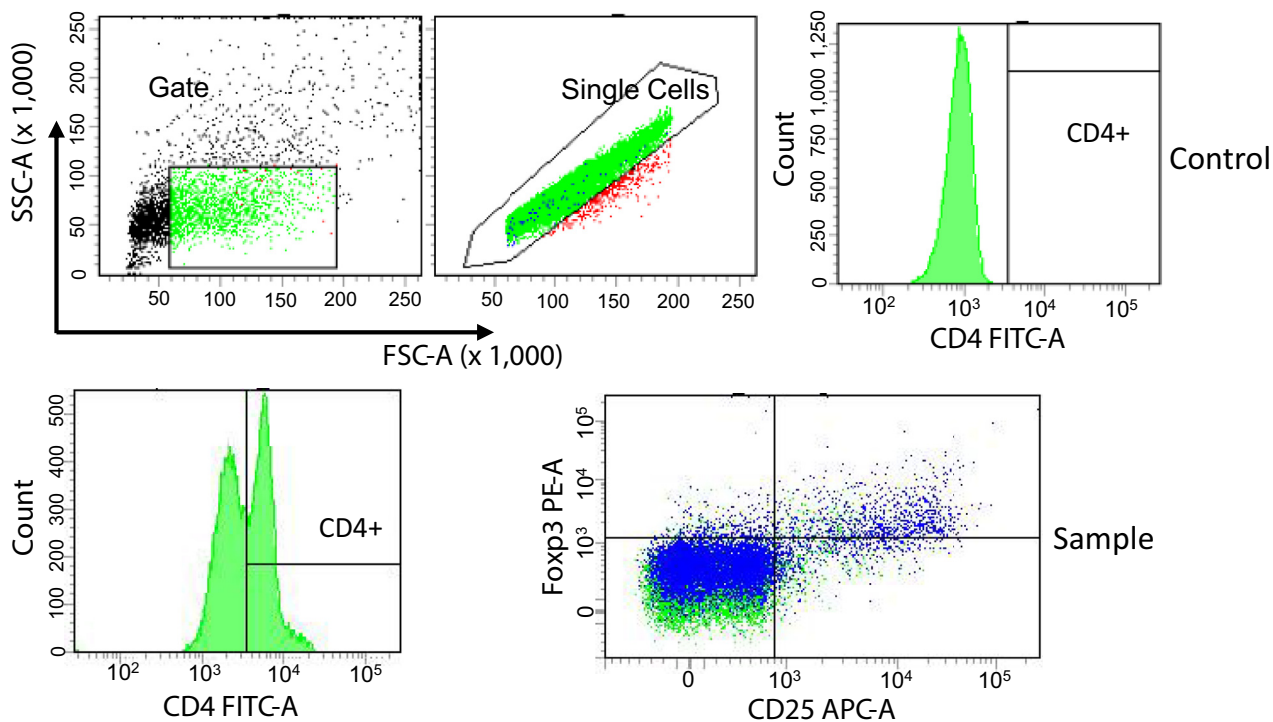

**Supplementary Fig (online only).** Gating strategy for Tregs. Peripheral blood mononuclear cells (PBMCs) were stained and analyzed on an LSRII flow cytometer. Forward (*FSC-A*) and side (*SSC-A*) scatter gating was used to remove debris and other events that were not of interest. Single cells were gated by *FSC-A* and *FSC-H*. Fluorescence minus one (FMO) controls (FMO CD4<sup>+</sup>, FMO CD25<sup>+</sup> and FMO Foxp3<sup>+</sup>) were used to get CD4<sup>+</sup>, CD25<sup>+</sup>, and Foxp3<sup>+</sup> Tregs.
